# Supplementary material
Source: PubMed Central journal article supplement (PMC7648600)
Supplement: develop-147-195388-s1.pdf [file develop-147-195388-s1.pdf]

SUPPLEMENTARY INFORMATION

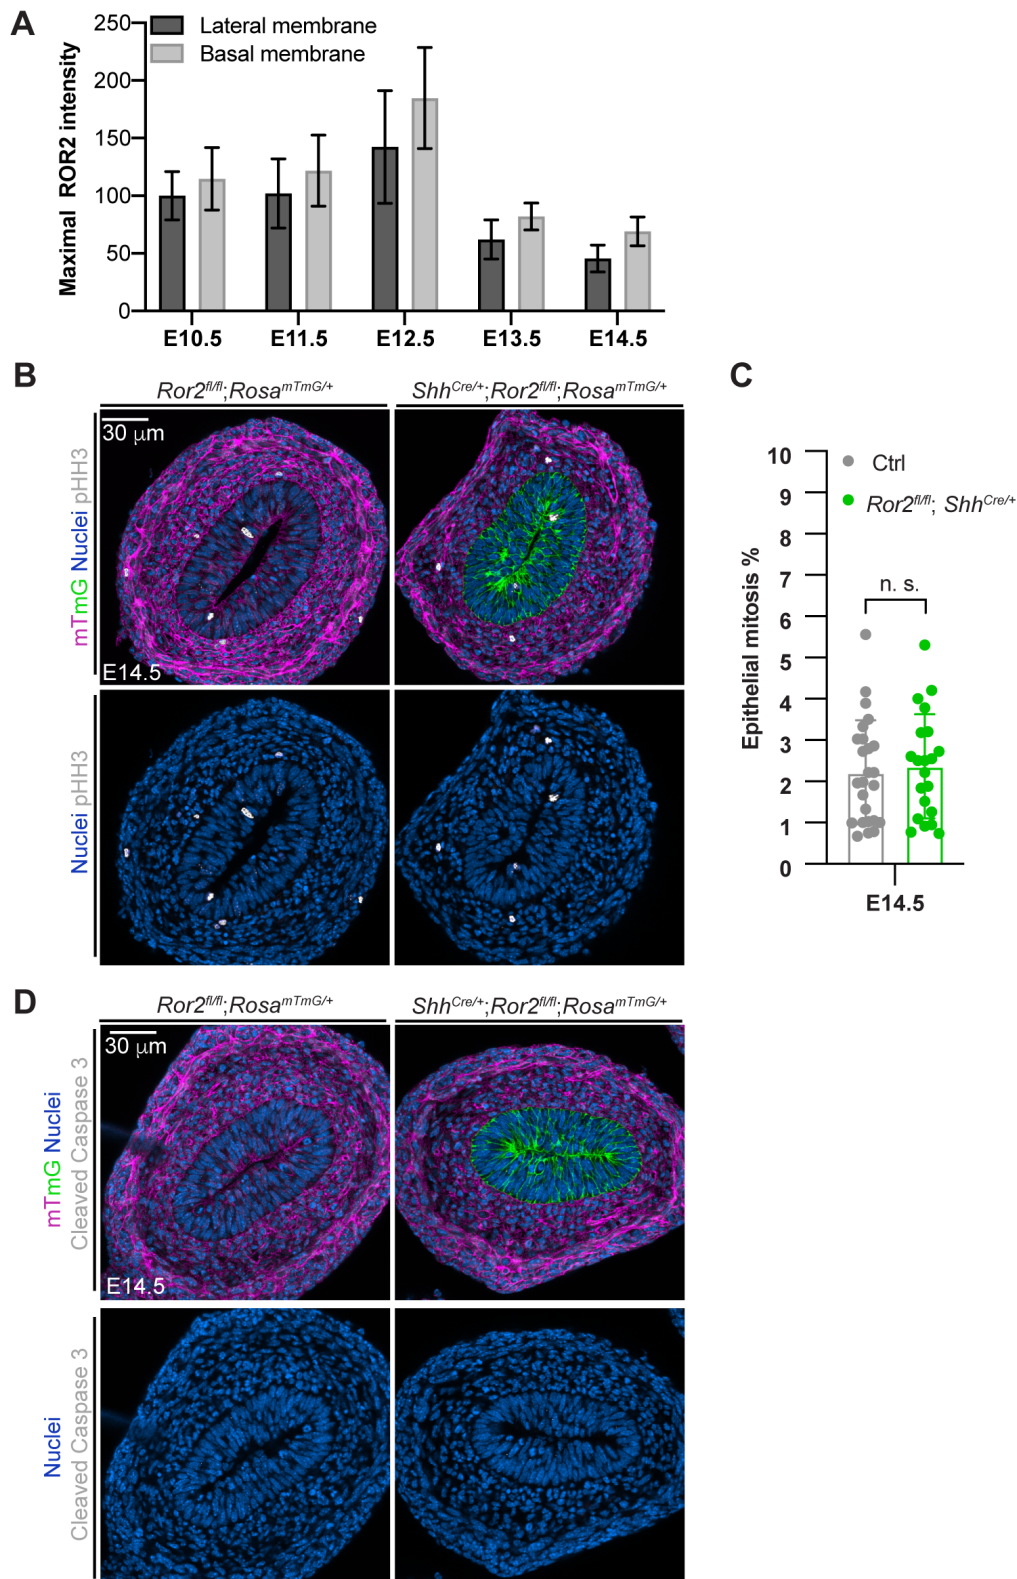

**Fig. S1. Epithelial mitosis rate is unaffected after the loss of epithelial ROR2, related to Fig. 1.**

(A) Quantification of the maximal ROR2 level on the lateral/basal membranes of epithelial cells at E10.5–14.5. For each stage, measurements were performed on 10 sections of 5 samples.

(B-C) Immunostaining of pHH3 on cross-sections of the control and epithelial *Ror2* depleted midguts. Quantitation of the epithelial mitosis rate was performed on 25 cross-sections of 5 control samples and 20 cross-sections of 4 *Ror2<sup>flox/flox</sup>; Shh<sup>Cre/+</sup>* samples.

(D) Immunostaining of cleaved caspase 3 (white) on cross-sections of midguts. No clear apoptosis was detected in either control or epithelial *Ror2* depleted midguts. Data are represented as mean  $\pm$  s.e.m. Analyses were performed using unpaired nonparametric tests (Mann-Whitney test). n. s. = not significant.

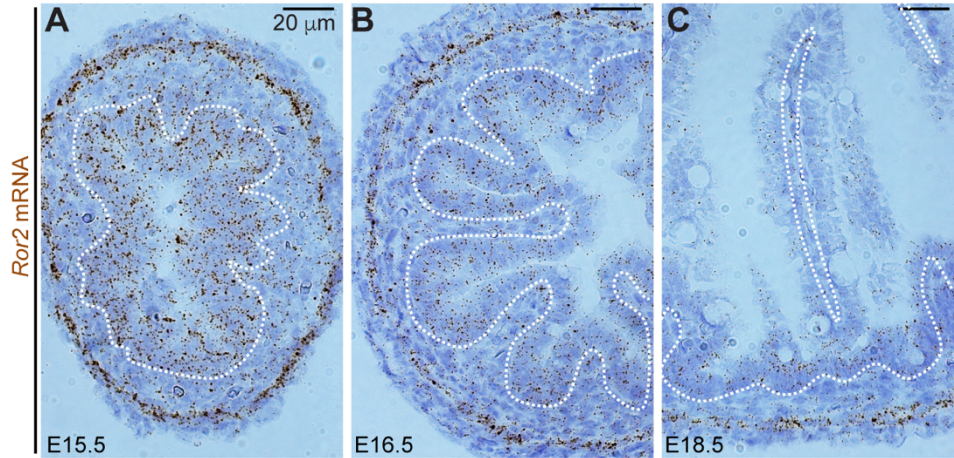

**Fig. S2. *Ror2* is present in the midgut throughout Phase II, related to Fig. 2.**

(A-C) RNAscope of *Ror2* on cross-sections of wildtype midguts at E15.5, E16.5, and E18.5. The epithelial-mesenchymal interface is outlined by white dashed lines. Scale bar, 20 μm.

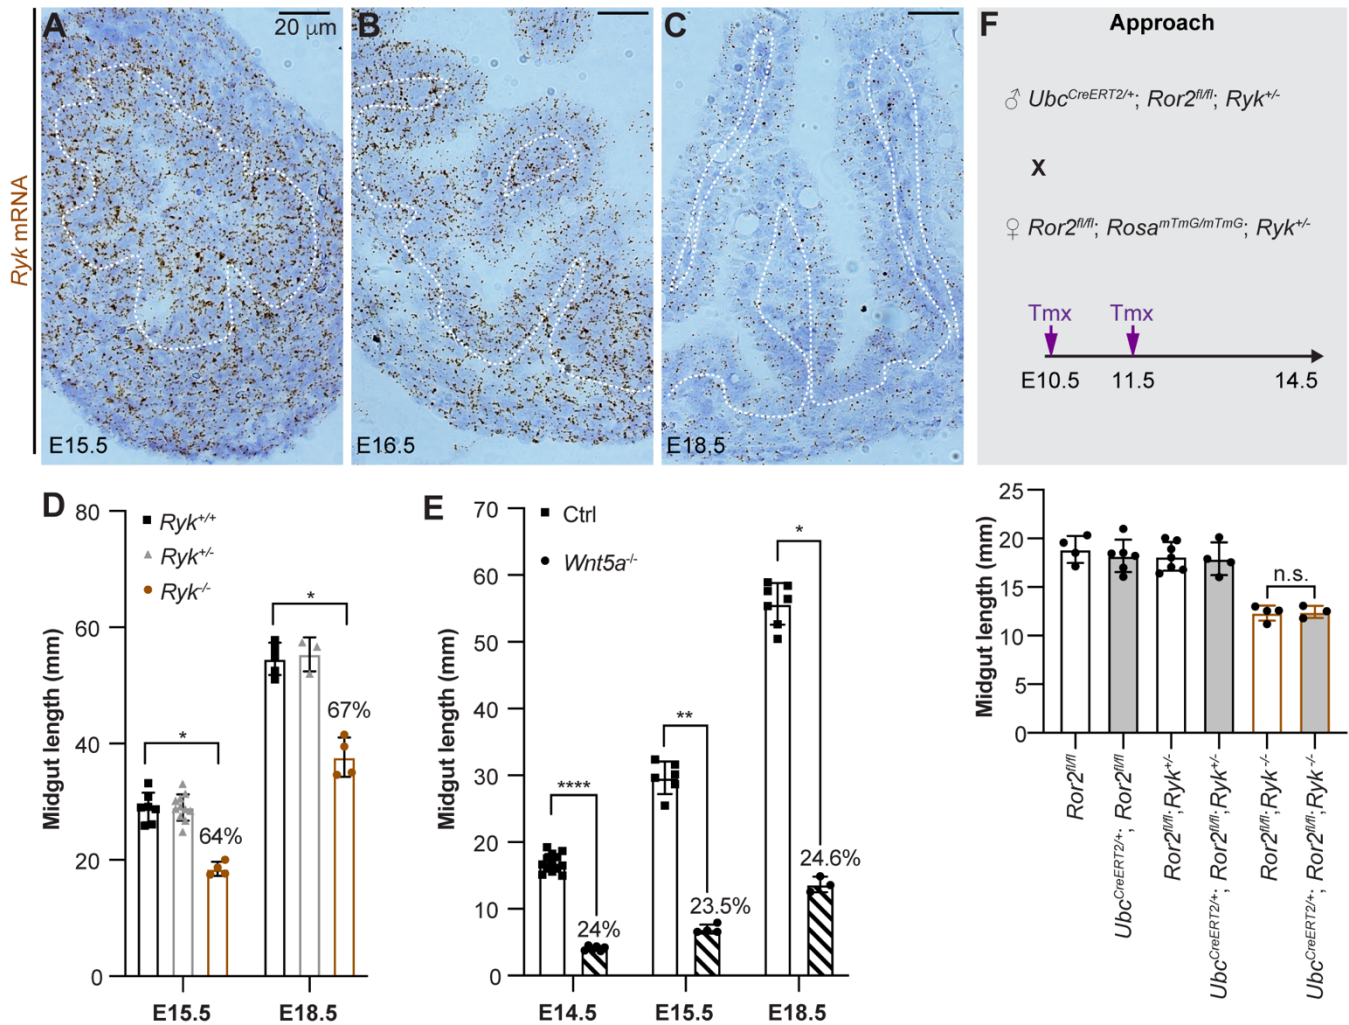

**Fig. S3. *Ryk* is present during Phase II but is not required for Phase II midgut elongation, related to Fig. 3.**

(A-C) RNAscope of *Ryk* on cross-sections of wildtype midguts at E15.5, E16.5, and E18.5. The epithelial-mesenchymal interface is outlined by white dotted lines. Scale bar, 20  $\mu$ m.

(D) Quantitation of the midgut length in  $Ryk^{+/+}$ ,  $Ryk^{+/-}$ , and  $Ryk^{-/-}$  embryos at E15.5 and E18.5.  $Ryk^{+/+}$ , n=7 (E15.5), n=4 (E18.5);  $Ryk^{+/-}$ , n=11 (E15.5), n=3 (E18.5);  $Ryk^{-/-}$ , n=4 (E15.5), n=4 (E18.5).

(E) Quantitation of the midgut length in control ( $Wnt5a^{+/+}$  and  $Wnt5a^{+/-}$ ) and  $Wnt5a^{-/-}$  embryos at E14.5, E15.5, and E18.5. Ctrl: n=13 (E14.5), n=6 (E15.5), n=7 (E18.5);  $Wnt5a^{-/-}$ , n=6 (E14.5), n=4 (E15.5), n=3 (E18.5).

(F) Approach for *Ror2/Ryk* double depletion (tamoxifen treatment beginning at E10.5) and quantitation of the midgut length of indicated genotypes.  $Ror2^{fl/fl}$ , n=4;  $Ror2^{fl/fl}; Ubc^{CreERT2/+}$ , n=6;  $Ror2^{fl/fl}; Ryk^{+/-}$ , n=7;  $Ror2^{fl/fl}; Ubc^{CreERT2/+}; Ryk^{+/-}$ , n=4;  $Ror2^{fl/fl}; Ryk^{-/-}$ , n=4;  $Ror2^{fl/fl}; Ubc^{CreERT2/+}; Ryk^{-/-}$ , n=3. Data are represented as mean  $\pm$  s.e.m. Analyses were performed using unpaired nonparametric tests (Mann-Whitney test). \*  $p < 0.05$ , \*\*  $p < 0.01$ , \*\*\*  $p < 0.001$ , \*\*\*\*  $p < 0.0001$ , and n. s. = not significant.

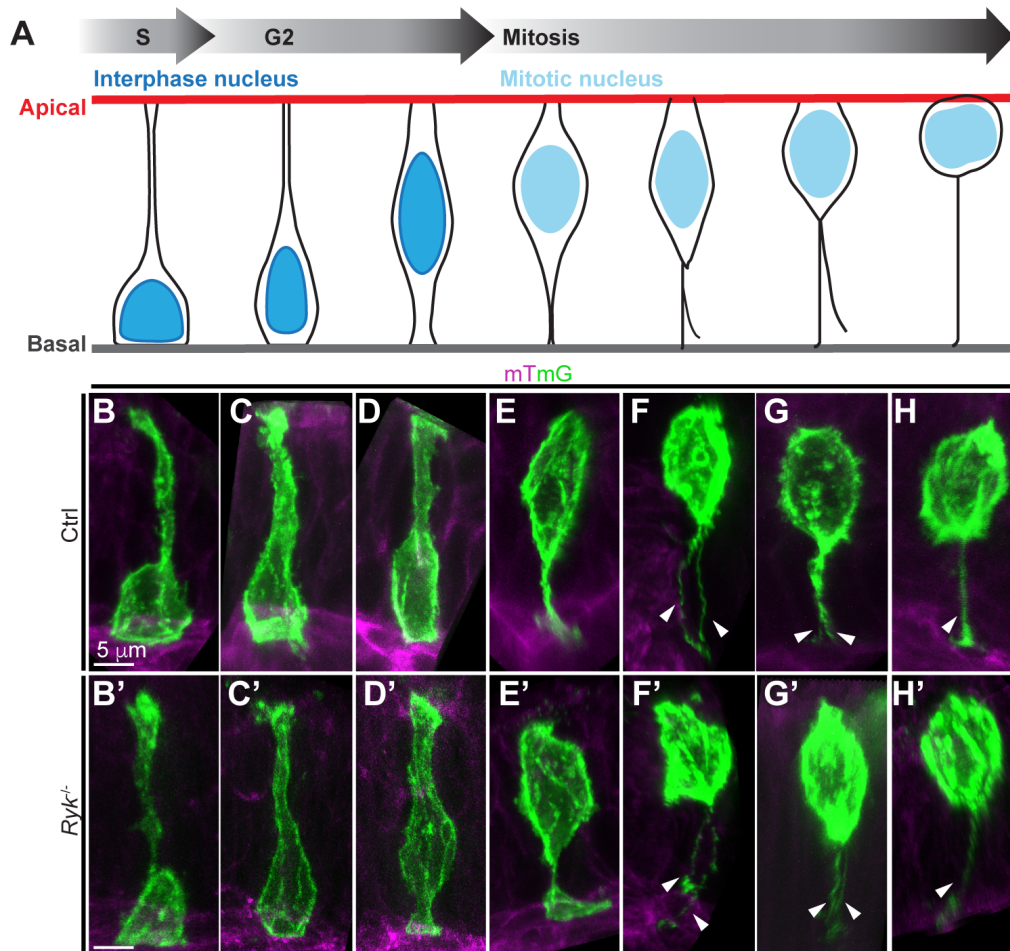

**Fig. S4. Epithelial cell behaviors before cytokinesis were unaffected in *Ryk*<sup>-/-</sup> midguts, related to Fig. 5.**

(A) Schematic illustration of cell behaviors before cytokinesis in Phase I midgut epithelium.

(B-H') 3D reconstructions of individual cells before cytokinesis in control and *Ryk*<sup>-/-</sup> midgut epithelium at E13.5, demonstrating that the apical nuclear migration (B-E, B'-E') and basal process splitting (F, F', G, G') were not affected in the absence of RYK; at the end of mitosis, usually, only one basal process is retained for both control and *Ryk*<sup>-/-</sup> cells (H, H'). Scale bar, 5 μm.

Table S1. Key resources

| REAGENT or RESOURCE                                                                    | SOURCE                             | IDENTIFIER                        |
|----------------------------------------------------------------------------------------|------------------------------------|-----------------------------------|
| Antibodies                                                                             |                                    |                                   |
| mouse anti-ROR2                                                                        | DSHB                               | Cat# N/A<br>RRID: AB_10804796     |
| rabbit anti-Ki67                                                                       | Thermo Fisher                      | Cat# RM-9106-S<br>RRID: AB_149707 |
| mouse anti-Phospho-histone H3                                                          | Millipore                          | Cat# 05-806<br>RRID: AB_310016    |
| rabbit Cleaved Caspase-3 (Asp175)                                                      | Cell signaling                     | Cat# 9661<br>RRID: AB_2341188     |
| rabbit anti-GFP Alexa Fluor 488 conjugated                                             | Thermo Fisher                      | Cat# A-21311<br>RRID: AB_221477   |
| Alexa Fluor® 488 Goat Anti-Mouse IgG (H+L)                                             | Thermo Fisher                      | Cat# A-11001<br>RRID: AB_2534069  |
| Alexa Fluor® 488 Goat Anti-Rabbit IgG (H+L) Antibody                                   | Thermo Fisher                      | Cat# A-11008<br>RRID: AB_143165   |
| Alexa Fluor® 546 Goat Anti-Rabbit IgG (H+L)                                            | Thermo Fisher                      | Cat# A-11010<br>RRID: AB_2534077  |
| Alexa Fluor® 555 Donkey Anti-Mouse IgG (H+L)                                           | Thermo Fisher                      | Cat# A-31570<br>RRID: AB_2536180  |
| Alexa Fluor® 647 Goat Anti-Rabbit IgG (H+L)                                            | Thermo Fisher                      | Cat# A-21244<br>RRID: AB_141663   |
| Bacterial and Virus Strains                                                            |                                    |                                   |
| Biological Samples                                                                     |                                    |                                   |
| Chemicals, Peptides, and Recombinant Proteins                                          |                                    |                                   |
| Hoechst                                                                                | Life Technologies                  | Cat# 33258                        |
| Alexa Fluor™ 647 Phalloidin                                                            | Thermo Fisher                      | Cat# A22287                       |
| ProLong™ Gold Antifade Mountant                                                        | Life Technologies                  | Cat# P36930                       |
| Tamoxifen                                                                              | Sigma                              | Cat# T5648                        |
| Focus Clear Kit                                                                        | Cedarlane Labs                     | Cat# F101-KIT                     |
| 1% Penicillin-Streptomycin-Glutamine                                                   | Gibco                              | Cat# 10378016                     |
| DMEM                                                                                   | Gibco                              | Cat# 21063029                     |
| Glass-bottom culture dish 35-mm                                                        | MatTek Corporation                 | Cat# P35G-0-20-C                  |
| Richard-Allan Scientific™ HistoGel™ Specimen Processing Gel                            | Thermo Fisher                      | Cat# HG-4000-012                  |
| RNAscope® 2.5 HD Assay- BROWN                                                          | ACD                                | 322300                            |
| RNAscope® Probe-Mm-Ror2                                                                | ACD                                | 430041                            |
| RNAscope® Probe-Mm-Ryk                                                                 | ACD                                | 549981                            |
| RNAscope® Negative Control Probe-DapB                                                  | ACD                                | 310043                            |
| RNAscope® Positive Control Probe-Mm-Ppib                                               | ACD                                | 313911                            |
| Critical Commercial Assays                                                             |                                    |                                   |
| Deposited Data                                                                         |                                    |                                   |
| Experimental Models: Cell Lines                                                        |                                    |                                   |
| Experimental Models: Organisms/Strains                                                 |                                    |                                   |
| Mouse: C57BL6/J                                                                        | Charles River                      | Strain Code: 027                  |
| Mouse: Ryk <sup>+/-</sup> : B6j.129S1/Sv-Ryk <sup>tm1STAC</sup>                        | Stacker lab (Halford et al., 2000) | N/A                               |
| Mouse: Ror2 <sup>fl/fl</sup> : B6;129S4-Ror2 <sup>tm1.1Meg/J</sup>                     | The Jackson Laboratory             | RRID:IMSR_JAX:018354              |
| Mouse: Rosa <sup>mTmG/+</sup> : Gt(ROSA)26Sor <sup>tm4(ACTB-tdTomato,-EGFP)Luo/J</sup> | The Jackson Laboratory             | RRID:IMSR_JAX:007576              |

| REAGENT or RESOURCE                                                                         | SOURCE                  | IDENTIFIER                                                                  |
|---------------------------------------------------------------------------------------------|-------------------------|-----------------------------------------------------------------------------|
| Mouse: <i>Shh</i> <sup>CreERT2/+</sup> ; B6.129S6- <i>Shh</i> <sup>tm2(cre/ERT2)Cjt/J</sup> | The Jackson Laboratory  | RRID:IMSR_JAX:005623                                                        |
| Mouse: <i>Shh</i> <sup>Cre/+</sup> ; B6.Cg- <i>Shh</i> <sup>tm1(EGFP/cre)Cjt/J</sup>        | The Jackson Laboratory  | RRID:IMSR_JAX:005622                                                        |
| Mouse: <i>Twist2</i> <sup>Cre/+</sup> ; B6.129X1- <i>Twist2</i> <sup>tm1.1(cre)Dor/J</sup>  | The Jackson Laboratory  | RRID:IMSR_JAX:008712                                                        |
| Mouse: <i>Shh</i> <sup>CreERT2/+</sup> ; B6.Cg-Ndor1 <sup>Tg(UBC-cre/ERT2)1Ejb/1J</sup>     | The Jackson Laboratory  | RRID:IMSR_JAX:007001                                                        |
| Oligonucleotides                                                                            |                         |                                                                             |
| Primers: <i>Ryk</i>                                                                         | Stacker lab             |                                                                             |
| <i>Ryk</i> -GTR: CAAGTAACATGCTCCCCAAAAC                                                     | (Halford et al., 2000)  |                                                                             |
| <i>Ryk</i> -GT WT: CAGGGCAGTGCATTCCATCT                                                     |                         |                                                                             |
| <i>Ryk</i> -GTKO3: GCGTTGGCTACCCGTGATA                                                      |                         |                                                                             |
| Primers: <i>Ror2</i> <sup>fllox</sup>                                                       | The Jackson Laboratory  | 14698; 14699                                                                |
| Primers: <i>mTmG</i>                                                                        | The Jackson Laboratory  | 22163; oIMR9020; oIMR9021                                                   |
| Primers: <i>Shh</i> <sup>Cre</sup>                                                          | The Jackson Laboratory  | oIMR1857; oIMR5960; oIMR5961                                                |
| Primers: <i>Shh</i> <sup>CreERT2</sup>                                                      | The Jackson Laboratory  | oIMR3798; oIMR7338; oIMR7339; oIMR8346;                                     |
| Primers: <i>Twist2</i> <sup>Cre</sup>                                                       | The Jackson Laboratory  | 15199; 15200; oIMR9174; oIMR9176                                            |
| Primers: <i>Ubc</i> <sup>CreERT2/+</sup>                                                    | The Jackson Laboratory  | 25285; oIMR7338; oIMR7339; oIMR9074                                         |
| Recombinant DNA                                                                             |                         |                                                                             |
| Software and Algorithms                                                                     |                         |                                                                             |
| Imaris                                                                                      | Bitplane                | <a href="http://www.bitplane.com/imaris">http://www.bitplane.com/imaris</a> |
| Fiji                                                                                        | Schindelin et al., 2012 | <a href="https://imagej.net/Fiji">https://imagej.net/Fiji</a>               |
| Other                                                                                       |                         |                                                                             |
